# Supplementary material for: RGD peptide-based lipids for targeted mRNA delivery and gene editing applications
Source: PubMed Central journal article supplement (PMC9450108; doi:10.1039/d2ra02771b), 2022-09-07
Supplement: RA-012-D2RA02771B-s001.pdf [file RA-012-D2RA02771B-s001.pdf]

## **Electronic Supplementary Information (ESI)**

RGD Peptide-based Lipids for Targeted mRNA Delivery and Gene

Editing Application

Qin, et al.

**Table S1.** Physical characterization of RGD-LNPs

| LNP formulation | Diameter (nm) | Polydispersity index (PDI) | Encapsulation efficiency (%) |
|-----------------|---------------|----------------------------|------------------------------|
| 1A              | 63.34         | 0.238                      | 36.03                        |
| 1B              | 75.73         | 0.036                      | 21.29                        |
| 1C              | 57.27         | 0.189                      | 8.14                         |
| 1D              | 77.09         | 0.043                      | 41.78                        |
| 1E              | 86.61         | 0.171                      | 42.14                        |
| 2A              | 82.83         | 0.270                      | 48.15                        |
| 2B              | 51.85         | 0.270                      | 19.38                        |
| 2C              | 64.09         | 0.078                      | 6.34                         |
| 2D              | 68.45         | 0.130                      | 2.69                         |
| 2E              | 224.1         | 0.109                      | 1.57                         |
| 3A              | 52.09         | 0.176                      | 3.89                         |
| 3B              | 46.68         | 0.174                      | 6.93                         |
| 3C              | 82.25         | 0.165                      | 3.87                         |
| 3D              | 109.6         | 0.219                      | 6.50                         |
| 3E              | 100.9         | 0.165                      | 2.49                         |
| 4A              | 95.46         | 0.297                      | 3.78                         |
| 4B              | 75.25         | 0.057                      | 2.56                         |
| 4C              | 58.43         | 0.088                      | 2.47                         |
| 4D              | 108.8         | 0.574                      | 4.29                         |
| 4E              | 93.68         | 0.076                      | 5.32                         |

**Table S2.** Physical characterization of RGD-LNPs with varying amounts of C12-200

| LNP formulation | Diameter (nm) | Polydispersity index (PDI) | Encapsulation efficiency (%) |
|-----------------|---------------|----------------------------|------------------------------|
| C12-200         | 79.09         | 0.152                      | 89.11                        |
| 1A              | 106.70        | 0.122                      | 89.49                        |
| 1B              | 88.77         | 0.061                      | 89.62                        |
| 1C              | 103.9         | 0.931                      | 86.46                        |
| 1D              | 92.54         | 0.088                      | 81.14                        |
| 1E              | 86.17         | 0.192                      | 88.44                        |
| 2A              | 130.70        | 0.224                      | 75.06                        |
| 2B              | 76.65         | 0.011                      | 72.61                        |

**Table S3.** Physical characterization of RGD-LNPs with the addition of C12-200

| LNP                         | Diameter (nm) | Polydispersity index (PDI) | Encapsulation efficiency (%) |
|-----------------------------|---------------|----------------------------|------------------------------|
| 10% RGD-lipid + 90% C12-200 | 123.14        | 0.134                      | 73.29                        |
| 20% RGD-lipid + 80% C12-200 | 133.65        | 0.227                      | 82.48                        |
| 30% RGD-lipid + 70% C12-200 | 104.83        | 0.128                      | 79.32                        |
| 40% RGD-lipid + 60% C12-200 | 122.34        | 0.313                      | 70.45                        |
| 50% RGD-lipid + 50% C12-200 | 119.97        | 0.236                      | 51.99                        |

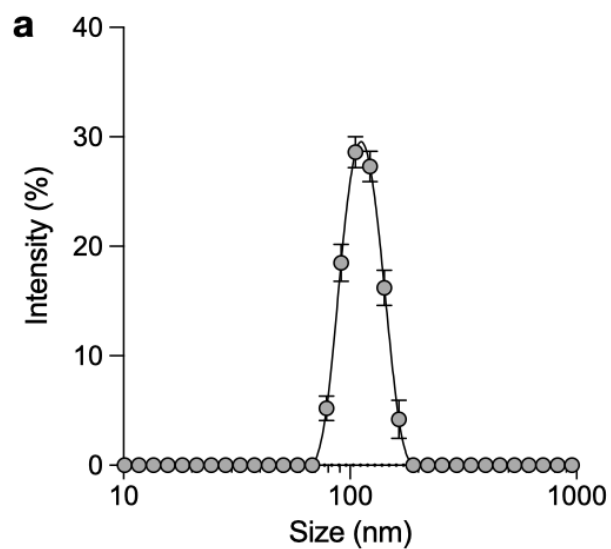

**Figure S1.** Dynamic light scattering (DLS) analysis of RGD-LNP 1A, showing the size and size distribution of n+3 measurements

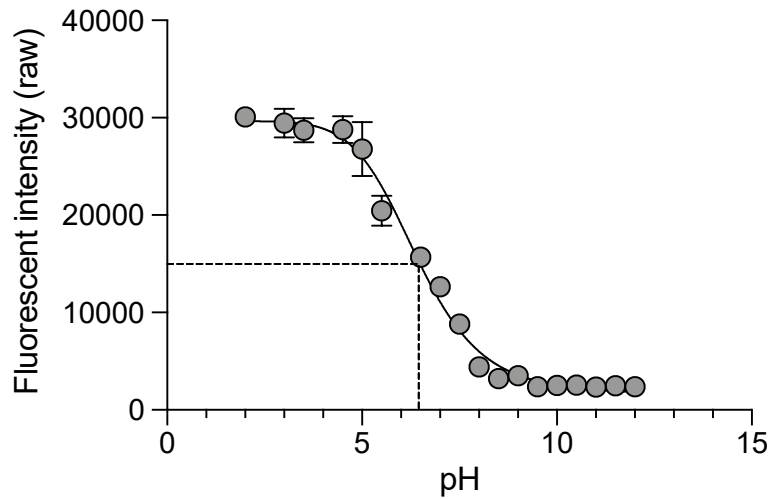

**Figure S2.** Result to determine RGD-lipid LNP (1A) pKa for the LNPs encapsulating luciferase mRNA. pKa is calculated as the pH corresponding to half of the maximum fluorescence value.

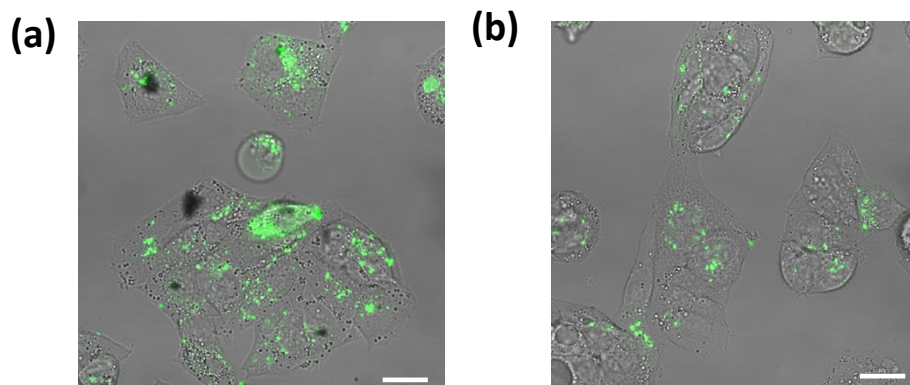

**Figure S3.** Confocal images (6h treat time with 1% DiO-labelling) to test the uptake of HepG2 cells for (A) C12-RGD hybrid LNP (lead LNP); (B) C12-200 LNP as a control. Scale bar: 20  $\mu$ m.

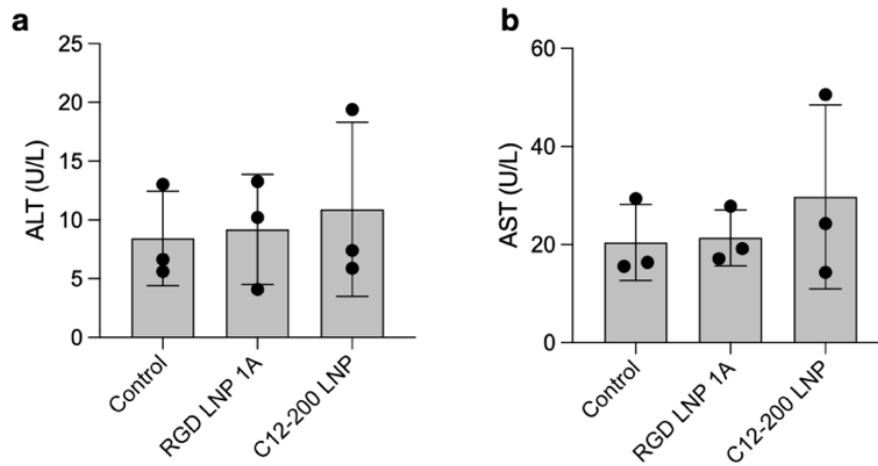

**Figure S4.** Liver enzymes for in vivo experiments indicates minimal toxicity

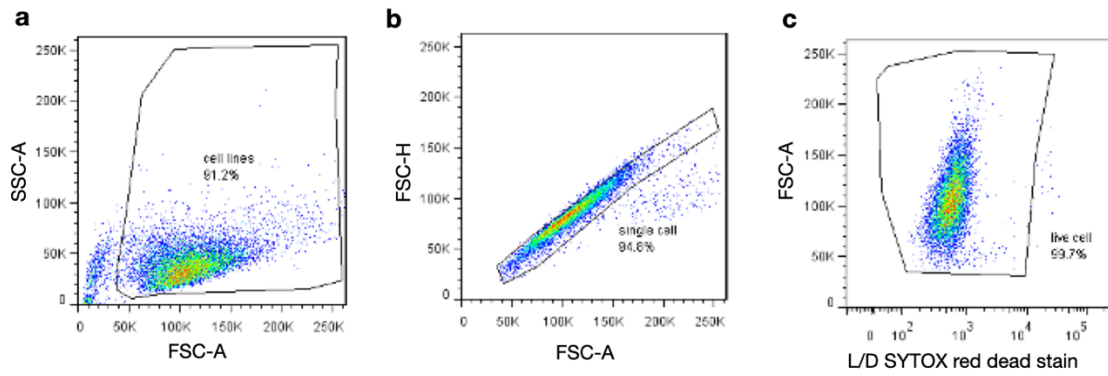

**Figure S5.** Flow gating strategy for knockdown of GFP expression in GFP+ HepG2 cells
